# Supplementary material for: Towards the conservation of Borneo’s freshwater mussels: rediscovery of the endemic Ctenodesma borneensis and first record of the non-native Sinanodonta lauta
Source: Springer Nature journal article supplement (doi:10.1007/s10531-020-01971-1), 2020-04-13
Supplement: MOESM1 [file 17889668]

## Sheet: Matrix
Sampling/interview site	Site ID	Date	LAT	LON	Basin	Unionida	pH	DO [mg/L]	Temp [dC]	Cond [uS/cm]	TAN [ug/L]	SRP [ug/L]	TP [ug/L]	OM (mg/L)	K [mg/L]	Ca [mg/L]
Sampling	BR1	2018-03-26	4.49365	114.639	Belait	no	5.48	5.8	25.2	13	27.0115	16.46	47	12.5	0.777	2.838
Sampling	BR2	2018-03-26	4.37724	114.663	Belait	no	4.75	6.2	26.9	15	2.53233	14.814	61.1	7	0.737	1.955
Sampling	BR3	2018-03-26	4.38973	114.466	Belait	no	6.6	8.4	27.8	10	64.1524	19.752	32.9	4	1.17	8.115
Sampling	BR4	2018-03-27	4.67318	114.648	Tutong	no	5.58	5.1	26.9	15	10.9734	14.814	65.8	10.5	0.695	2.574
Sampling	BR5	2018-03-27	4.59391	114.674	Tutong	no	5.21	2.6	30.6	9	48.1143	14.814	68.15	10.6667	0.651	1.906
Sampling	BR6	2018-03-27	4.50297	114.773	Tutong	no	5.92	5.7	28.6	17	43.8937	11.522	35.25	8.5	0.618	2.141
Sampling	BR7	2018-03-27	4.65667	114.741	Tutong	no	6.4	6.2	26.1	49	4.22055	18.106	65.8	9	1.532	3.117
Sampling	BR8	2018-03-29	4.57889	115.122	Temburong	no	6.66	7.2	26.5	13	0.84411	16.46	51.7	4.5	0.438	2.099
Sampling	BR9	2018-03-29	4.65025	115.096	Temburong	no	4.62	6.2	30	72	69.217	14.814	42.3	5	0.842	4.73
Sampling	BR10	2018-03-30	4.56039	115.151	Temburong	no	6.7	6.8	24.6	21	7.59699	18.106	28.2	3.5	0.377	2.375
Sampling	BR11	2018-03-30	4.56097	115.154	Temburong	no	6.77	7.6	26.4	26	1.68822	18.106	25.85	2	0.264	2.372
Sampling	BR12	2018-03-30	4.55867	115.175	Temburong	no	6.95	6.6	24.6	41	10.9734	19.752	25.85	34	0.415	3.481
Sampling	BR13	2018-03-30	4.74334	115.399	Merapok	no	7.04	6.8	26.9	9	8.4411	18.106	23.5	3.25	0.606	2.281
Sampling	BR14	2018-03-30	4.83791	115.335	Mulam	no	6.44	7.4	29.2	27	27.0115	77.362	220.9	6.75	1.344	3.826
Sampling	BR15	2018-04-01	4.5844	114.88	Limbang	no	7.32	8.5	25	191	0.84411	16.46	216.2	26.5	1.91	30.232
Sampling	BR16	2018-07-08	4.36672	114.9	Limbang	no	4.42	5.9	26	26.3	6.321	8.24	39.533	7	0.269	5.283
Sampling	BR17	2018-07-08	4.35779	114.907	Limbang	no	6.67	7	26.4	26.8	1.806	6.592	54.738	6.33333	0.35	17.419
Sampling	BR18	2018-07-08	4.3846	114.901	Limbang	no	6.1	5.9	25.4	27	3.612	11.536	18.246	9.66667	0.359	5.586
Sampling	BR19	2018-07-08	4.38734	114.904	Limbang	no	6.94	7.2	27.3	28.4	2.709	16.48	124.681	10.3333	0.607	5.11
Sampling	BR20	2018-07-08	4.38735	114.909	Limbang	no	6.94	7.2	27.3	28.4	1.788	17.677	88.189	8.33333	0.562	4.555
Sampling	BR21	2018-07-09	4.39625	114.917	Limbang	no	6.5	4.2	25.1	27	8.94	17.677	456.15	36	0.775	5.474
Sampling	BR22	2018-07-09	4.39747	114.919	Limbang	Ctenodesma borneensis	6.68	4	25.5	26.4	0.894	19.284	255.444	20	0.621	4.682
Sampling	BR23	2018-07-09	4.39606	114.916	Limbang	no	6.48	2.5	25.5	26.3	5.364	19.284	191.583	24	1.084	6.66
Sampling	BR24	2018-07-10	4.38597	114.935	Limbang	no	6.4	4.5	26.2	26.1	7.224	19.776	48.656	8	1.257	4.864
Sampling	BR25	2018-07-10	4.38614	114.935	Limbang	no	6.47	4.4	25.6	25.8	0.903	14.832	45.615	6	0.76	8.671
Sampling	BR26	2018-07-10	4.47956	114.929	Limbang	no	6.93	6.3	25.3	25.5	1.806	13.184	48.656	7.5	0.703	3.987
Sampling	BR27	2018-07-10	4.74794	115.286	Trusan	no	6.68	4.2	28.2	28.5	1.806	14.832	72.984	12	0.506	3.772
Sampling	BR28	2018-07-10	4.77572	115.251	Trusan	Sinanodonta lauta	6.36	3.9	30.3	31	11.739	21.424	91.23	8.5	1.48	4.558
Sampling	BR29	2018-07-11	4.35778	115.461	Trusan	no	6.72	7.3	24.5	24.7	9.933	23.072	80.676	9	1.045	3.915
Sampling	BR30	2018-07-11	4.38386	115.437	Trusan	no	6.98	8.5	22.5	22.8	5.418	18.128	77.688	7.5	1.148	3.18
Sampling	BR31	2018-07-12	4.37219	115.438	Trusan	no	6.95	7.6	22.3	22.3	4.515	18.128	427.284	35.3333	0.996	5.902
Sampling	BR32	2018-07-12	4.42153	115.466	Trusan	no	6.83	7.1	22.7	22.8	1.806	11.536	56.772	7.5	0.808	3.846
Sampling	BR33	2018-07-12	4.47178	115.478	Trusan	no	6.94	7.2	22.4	23.5	0.903	9.888	68.724	9	0.772	2.661
Sampling	BR34	2018-07-12	4.46736	115.475	Trusan	no	6.86	2	27.6	27.4	21.672	9.888	98.604	3	1.289	3.3
Sampling	BR35	2018-07-12	4.55244	115.487	Trusan	no	6.96	7.6	22.8	24.3	1.806	9.888	29.88	6	0.567	2.23
Sampling	BR36	2018-07-12	4.57681	115.462	Trusan	no	nd	nd	nd	nd	2.709	14.832	59.76	10.5	0.585	2.344
Sampling	BR37	2018-07-12	4.6795	115.389	Trusan	no	6.96	7.1	25.5	25.6	73.143	32.96	nd	6	1.879	4.246
Sampling	BR38	2018-07-13	4.73394	115.398	Merapok	no	6.5	6.9	26.2	26.1	8.127	36.256	331.668	11	1.608	2.31
Sampling	BR39	2018-07-13	4.61111	115.333	Trusan	no	6.78	6	28.3	27.4	0.903	11.536	26.892	3.71429	0.724	2.828
Sampling	BR40	2018-07-14	4.43817	114.951	Limbang	no	6.46	5.3	26	25.7	18.06	14.832	38.844	7	0.362	5.09
Sampling	BR41	2018-07-14	4.40906	114.98	Limbang	no	6.76	5.9	26.7	28	1.806	14.832	8.964	6	0.468	3.766
Sampling	BR42	2018-07-15	4.28761	114.43	Belait	no	nd	nd	nd	nd	1.806	11.536	8.964	0.4	1.096	4.694
Sampling	BR43	2018-07-15	4.28272	114.426	Belait	no	nd	nd	nd	nd	5.418	14.832	38.844	8.5	1.086	9.196
Interview only		2018-03-26	4.28395	114.419		no
Interview only		2018-03-26	4.52745	114.574		no
Interview only		2018-03-26	4.42683	114.465		no
Interview only		2018-03-27	4.76467	114.666		no
Interview only		2018-03-27	4.73377	114.666		no
Interview only		2018-03-27	4.73252	114.65		no
Interview only		2018-03-27	4.70009	114.674		no
Interview only		2018-03-27	4.68551	114.643		no
Interview only		2018-03-27	4.66871	114.646		no
Interview only		2018-03-27	4.61224	114.698		no
Interview only		2018-03-27	4.57608	114.721		no
Interview only		2018-03-28	4.68588	115.014		no
Interview only		2018-03-28	4.71287	115.077		no
Interview only		2018-03-29	4.6175	114.926		no
Interview only		2018-03-29	4.68757	115.025		no
Interview only		2018-03-29	4.66781	115.047		no
Interview only		2018-03-29	4.70732	115.072		no
Interview only		2018-03-30	4.71753	115.109		no
Interview only		2018-03-30	4.76461	115.194		no
Interview only		2018-03-30	4.85994	115.406		no
Interview only		2018-03-30	4.81892	115.407		no
Interview only		2018-03-30	4.82556	115.452		no
Interview only		2018-03-30	4.80425	115.409		no
Interview only		2018-04-01	4.65958	114.954		no
Interview only		2018-04-01	4.4828	114.916	Limbang	no
Interview only		2018-07-08	4.45477	114.929	Limbang	no
Interview only		2018-07-09	4.02882	114.803	Baram	no
Interview only		2018-07-09	4.49185	114.905		no
Interview only		2018-07-10	4.66117	114.932	Limbang	no
interview only		2018-07-10	4.74611	115.285	Trusan	no
interview only		2018-07-11	4.47017	115.476		no
Interview only		2018-07-13	4.85522	115.391		no
Interview only		2018-07-13	4.83783	115.333	Merapok	no
Interview only		2018-07-13	4.67397	115.333	Trusan	no
Interview only		2018-07-13	4.69869	115.349	Trusan	no
Interview only		2018-07-14	4.45094	114.938	Limbang	no
Interview only		2018-07-14	4.42772	114.954	Limbang	no
Interview only		2018-07-14	4.45489	114.935	Limbang	no

## Sheet: additional information
Article title: Towards the conservation of Borneo’s freshwater mussels: rediscovery of the endemic Ctenodesma borneensis and first record of the non-native Sinanodonta lauta
Journal name: Biodiversity and Conservation
Author names: Alexandra Zieritz, Hussein Taha, Manuel Lopes-Lima, John Pfeiffer, Sing Kong Wah, Zohrah Sulaiman, Suzanne McGowan, Khairul Adha Rahim
Corresponding author: Alexandra Zieritz
University of Nottingham, School of Geography, University Campus, NG7 2RD Nottingham, UK; Alexandra.zieritz@nottingham.ac.uk
